# Supplementary material
Source: publisher site journal article supplement (https://www.spandidos-publications.com/3693/downloadSupplementary)
Supplement: Supplementary file 1 [file downloadSupplementary]

## Sheet: Sheet1
Gene	LncRNA	CorrelationCoefficient	P-value
GSTM1	lnc-UPP2-4:1	0.999987	2.42343e-10
GSTM1	lnc-HSP90AA1-31:1	0.999914	1.11347e-08
GSTM1	MAL2-AS1:4	0.999886	1.93779e-08
GSTM1	lnc-CYP46A1-35:119	0.999781	7.19027e-08
GSTM1	lnc-TRIM49C-20:1	0.999763	8.44593e-08
GSTM1	lnc-PAPOLG-15:2	0.999758	8.78559e-08
GSTM1	lnc-BMP8B-10:1	0.999698	1.36398e-07
GSTM1	lnc-CYP46A1-35:127	0.999688	1.46065e-07
GSTM1	H19:12	0.999683	1.50976e-07
GSTM1	lnc-ADAMTS8-20:2	0.999647	1.87377e-07
GSTM1	lnc-CCDC169-107:3	0.999593	2.48069e-07
GSTM1	lnc-NHSL2-17:1	0.999585	2.58376e-07
GSTM1	MAL2-AS1:5	0.999563	2.86137e-07
GSTM1	lnc-PDCD1-15:6	0.999555	2.97608e-07
GSTM1	lnc-PPP1R14C-5:1	0.999523	3.406e-07
GSTM1	MIR503HG:11	0.999511	3.57923e-07
GSTM1	RNF217-AS1:11	0.999475	4.13908e-07
GSTM1	lnc-DNAJB7-3:1	0.999449	4.56055e-07
GSTM1	XIST:56	0.999395	5.49036e-07
GSTM1	lnc-SESTD1-3:1	0.999391	5.55407e-07
GSTM1	TCONS_00020399	0.999328	6.77811e-07
GSTM1	lnc-EFHC1-47:1	0.999316	7.00708e-07
GSTM1	lnc-ATP6V0E1-128:1	0.999309	7.15168e-07
GSTM1	lnc-SNX3-36:1	0.999285	7.66389e-07
GSTM1	LINC01515:25	0.999246	8.52127e-07
GSTM1	lnc-PDE5A-7:1	0.999234	8.80308e-07
GSTM1	lnc-PDE5A-7:2	0.999229	8.90468e-07
GSTM1	lnc-N6AMT1-98:1	0.999207	9.43073e-07
GSTM1	lnc-CYP46A1-35:54	0.999182	1.00463e-06
GSTM1	lnc-SDCBP-8:5	0.999056	1.33592e-06
GSTM1	lnc-PDE5A-7:3	0.99905	1.35407e-06
GSTM1	lnc-HS6ST2-27:1	0.999045	1.36698e-06
GSTM1	XIST:53	0.99904	1.38315e-06
GSTM1	lnc-HDAC8-2:1	0.999022	1.43331e-06
GSTM1	lnc-PEX1-23:1	0.999021	1.43821e-06
GSTM1	FAM95B1:17	-0.998987	1.53819e-06
GSTM1	lnc-ZBTB6-13:1	-0.998959	1.62636e-06
GSTM1	lnc-MAGEA11-18:1	0.99893	1.7157e-06
GSTM1	GNAS-AS1:3	0.998928	1.72224e-06
GSTM1	lnc-PMEL-46:4	0.998925	1.73199e-06
GSTM1	ZBED3-AS1:71	-0.998822	2.0796e-06
GSTM1	lnc-PDE5A-7:5	0.998787	2.20698e-06
GSTM1	lnc-MBD2-91:1	0.998768	2.27441e-06
GSTM1	lnc-OR52A1-55:1	0.998764	2.28982e-06
GSTM1	lnc-CPN1-101:1	0.998758	2.31378e-06
GSTM1	lnc-NRCAM-25:13	-0.998711	2.49129e-06
GSTM1	lnc-POLE4-8:8	-0.998704	2.51649e-06
GSTM1	lnc-SH2D1B-43:10	0.99867	2.65377e-06
GSTM1	lnc-GPR4-4:1	0.998655	2.71219e-06
GSTM1	lnc-PKMYT1-41:2	-0.998613	2.88623e-06
NLRP11	lnc-MESP2-8:1	0.999944	4.74678e-09
NLRP11	lnc-MYC-46:1	0.999896	1.61265e-08
NLRP11	lnc-HDAC7-21:1	0.999862	2.85934e-08
NLRP11	lnc-TRIM74-61:1	0.999824	4.63836e-08
NLRP11	lnc-MBD2-18:1	0.99975	9.3413e-08
NLRP11	lnc-FAM84B-49:2	0.999661	1.72775e-07
NLRP11	lnc-MAVS-54:1	0.999636	1.9882e-07
NLRP11	lnc-PRY-60:5	0.999548	3.05775e-07
NLRP11	lnc-SHKBP1-37:9	0.999535	3.24955e-07
NLRP11	lnc-SLC30A7-31:1	0.999515	3.52541e-07
NLRP11	lnc-AKT1-33:3	0.999497	3.79293e-07
NLRP11	lnc-PIPOX-72:1	0.999487	3.94776e-07
NLRP11	TRHDE-AS1:13	0.999405	5.31335e-07
NLRP11	lnc-DCUN1D5-8:10	0.999336	6.60891e-07
NLRP11	lnc-IQSEC2-30:1	0.999321	6.91249e-07
NLRP11	lnc-ZFAND5-69:1	0.999296	7.43809e-07
NLRP11	lnc-HSPD1-38:1	0.99927	7.98313e-07
NLRP11	lnc-SNX10-76:28	0.999254	8.34071e-07
NLRP11	lnc-SEMA4D-34:7	0.999179	1.00962e-06
NLRP11	lnc-FAM131A-50:1	0.999177	1.01679e-06
NLRP11	lnc-SULF1-25:1	0.999147	1.08988e-06
NLRP11	lnc-CARD6-71:1	0.999134	1.12503e-06
NLRP11	lnc-CIB1-86:1	0.999116	1.17106e-06
NLRP11	lnc-FAM84B-34:9	0.999087	1.25035e-06
NLRP11	lnc-PRY-47:1	0.999003	1.48929e-06
NLRP11	lnc-SPARCL1-11:1	0.998992	1.52407e-06
NLRP11	lnc-ZNF292-24:1	0.998941	1.68089e-06
NLRP11	TCONS_00024910	0.998908	1.78892e-06
NLRP11	lnc-HCRTR2-36:1	0.998882	1.87357e-06
NLRP11	lnc-OLIG1-178:1	0.998851	1.9804e-06
NLRP11	lnc-OLIG1-179:1	0.998851	1.9804e-06
NLRP11	lnc-CCT6A-52:3	0.998839	2.02178e-06
NLRP11	lnc-FAM72B-6:2	0.998829	2.05708e-06
NLRP11	LINC01873:2	0.998824	2.07284e-06
NLRP11	lnc-RTN1-32:3	0.998785	2.21271e-06
NLRP11	lnc-CAMKV-15:2	0.998779	2.23439e-06
NLRP11	lnc-ZNF678-46:2	0.998747	2.35516e-06
NLRP11	lnc-DIP2B-3:1	0.99872	2.4559e-06
NLRP11	lnc-NPY4R2-505:1	0.998695	2.55373e-06
NLRP11	lnc-DAB2IP-16:1	0.998651	2.72674e-06
NLRP11	lnc-TNF-104:3	0.998558	3.11815e-06
EIF1AY	lnc-MATN4-31:1	0.999937	5.99303e-09
EIF1AY	lnc-PTPA-27:1	0.999926	8.13322e-09
EIF1AY	lnc-PRMT2-27:6	0.999876	2.31203e-08
EIF1AY	lnc-DAZ1-161:1	0.999847	3.52124e-08
EIF1AY	POLH-AS1:2	0.999615	2.21818e-07
EIF1AY	lnc-UBR3-79:3	0.999611	2.26556e-07
EIF1AY	TCONS_00001472	0.999506	3.66609e-07
EIF1AY	lnc-CARD6-257:1	0.999497	3.79328e-07
EIF1AY	TCONS_00018801	0.999482	4.01882e-07
EIF1AY	TOB1-AS1:10	0.999377	5.81164e-07
EIF1AY	UGDH-AS1:3	0.999359	6.1686e-07
EIF1AY	lnc-SLURP2-51:1	0.999275	7.87327e-07
EIF1AY	TCONS_00028636	0.999263	8.15647e-07
EIF1AY	lnc-FRYL-2:2	0.999252	8.3946e-07
EIF1AY	TCONS_00006477	0.999179	1.01137e-06
EIF1AY	lnc-EPAS1-59:1	0.999128	1.14041e-06
EIF1AY	TCONS_00003403	0.999085	1.2562e-06
EIF1AY	TCONS_00016886	0.998983	1.54947e-06
EIF1AY	lnc-N6AMT1-168:1	0.998918	1.75679e-06
EIF1AY	lnc-CAV3-2:2	0.998914	1.76734e-06
EIF1AY	lnc-ADH1B-33:2	0.998904	1.80004e-06
EIF1AY	lnc-CARD6-338:1	0.998904	1.80061e-06
EIF1AY	lnc-GPR150-118:1	0.998891	1.84375e-06
EIF1AY	lnc-FAM131A-45:1	0.998877	1.89073e-06
EIF1AY	lnc-RECK-327:4	0.998845	1.9986e-06
EIF1AY	lnc-ZNF514-20:2	0.998803	2.14657e-06
EIF1AY	MAP3K20-AS1:3	0.998793	2.18539e-06
EIF1AY	LINC00426:16	0.998788	2.20092e-06
EIF1AY	lnc-SRSF9-20:1	0.998644	2.75889e-06
EIF1AY	lnc-GSTP1-4:1	0.998627	2.82603e-06
EIF1AY	lnc-CARD6-328:1	0.998605	2.91863e-06
EIF1AY	lnc-MPP7-70:1	0.998594	2.96315e-06
EIF1AY	lnc-PIFO-8:1	0.998589	2.98467e-06
MDK	lnc-OR52A1-55:1	0.99991	1.20919e-08
P4HA2	lnc-OR52A1-55:1	0.999898	1.57178e-08
LRRN4CL	lnc-OR52A1-55:1	0.999892	1.7457e-08
CEP97	lnc-OR52A1-55:1	-0.99987	2.51543e-08
TEK	lnc-OR52A1-55:1	0.999835	4.09542e-08
MYF5	lnc-OR52A1-55:1	0.999816	5.09802e-08
CDH19	lnc-OR52A1-55:1	0.99981	5.42528e-08
AJUBA	lnc-OR52A1-55:1	0.999785	6.93988e-08
CLEC11A	lnc-OR52A1-55:1	0.999768	8.04789e-08
B4GALNT3	lnc-OR52A1-55:1	0.999757	8.85724e-08
CNTN4	lnc-OR52A1-55:1	0.99972	1.17981e-07
CHRD	lnc-OR52A1-55:1	0.999708	1.27768e-07
KRT6B	lnc-OR52A1-55:1	0.999706	1.29772e-07
CALD1	lnc-OR52A1-55:1	0.999702	1.33518e-07
FMO1	lnc-OR52A1-55:1	0.999702	1.33563e-07
MUSK	lnc-OR52A1-55:1	0.999676	1.57501e-07
RALGPS1	lnc-OR52A1-55:1	-0.999669	1.64035e-07
HBG2	lnc-OR52A1-55:1	0.999669	1.6473e-07
LAMB3	lnc-OR52A1-55:1	0.999648	1.85825e-07
CXorf36	lnc-OR52A1-55:1	0.99963	2.05217e-07
TBX18	lnc-OR52A1-55:1	0.999565	2.84255e-07
PDLIM3	lnc-OR52A1-55:1	0.999546	3.09095e-07
TEAD2	lnc-OR52A1-55:1	0.999542	3.1485e-07
ACTG2	lnc-OR52A1-55:1	0.99954	3.17377e-07
IGSF1	lnc-OR52A1-55:1	0.999539	3.18605e-07
GABARAP	lnc-OR52A1-55:1	0.999535	3.24169e-07
KRT6A	lnc-OR52A1-55:1	0.999533	3.26441e-07
PROCR	lnc-OR52A1-55:1	0.99952	3.4535e-07
GLTSCR2	lnc-OR52A1-55:1	0.999505	3.67747e-07
CD36	lnc-OR52A1-55:1	0.999504	3.68245e-07
KIAA1217	lnc-OR52A1-55:1	0.999503	3.69887e-07
GLTP	lnc-OR52A1-55:1	0.999493	3.85982e-07
MYO18B	lnc-OR52A1-55:1	0.999491	3.88252e-07
TNNC2	lnc-OR52A1-55:1	0.999483	4.01152e-07
KRT28	lnc-OR52A1-55:1	0.999471	4.19484e-07
PMEL	lnc-OR52A1-55:1	0.999468	4.24466e-07
RAB34	lnc-OR52A1-55:1	0.999452	4.50502e-07
LAMC3	lnc-OR52A1-55:1	0.999424	4.98251e-07
PDZD4	lnc-OR52A1-55:1	-0.999409	5.23117e-07
PODN	lnc-OR52A1-55:1	0.999409	5.24232e-07
ITPRIP	lnc-OR52A1-55:1	0.999408	5.25873e-07
TAGLN	lnc-OR52A1-55:1	0.999404	5.32341e-07
AGR2	lnc-OR52A1-55:1	0.999404	5.33179e-07
EEF1A1	lnc-OR52A1-55:1	0.999403	5.34689e-07
LHFPL2	lnc-OR52A1-55:1	0.999403	5.35363e-07
CD276	lnc-OR52A1-55:1	0.999393	5.52139e-07
ISLR	lnc-OR52A1-55:1	0.999391	5.55453e-07
EMP3	lnc-OR52A1-55:1	0.999387	5.63156e-07
AR	lnc-OR52A1-55:1	0.999381	5.74023e-07
PPAP2B	lnc-OR52A1-55:1	0.99936	6.14382e-07
PDGFD	lnc-OR52A1-55:1	0.999357	6.19923e-07
PGM1	lnc-OR52A1-55:1	0.999354	6.25462e-07
ATP8B1	lnc-OR52A1-55:1	0.999353	6.28014e-07
HMCN2	lnc-OR52A1-55:1	0.99935	6.3313e-07
EMILIN2	lnc-OR52A1-55:1	0.999349	6.36021e-07
MCAM	lnc-OR52A1-55:1	0.999343	6.47001e-07
CDS2	lnc-OR52A1-55:1	-0.999341	6.51302e-07
SORT1	lnc-OR52A1-55:1	-0.999339	6.55575e-07
PCDH7	lnc-OR52A1-55:1	0.999333	6.67013e-07
MAP1LC3C	lnc-OR52A1-55:1	0.999329	6.75895e-07
ADGRG6	lnc-OR52A1-55:1	0.999323	6.86661e-07
FAM171A1	lnc-OR52A1-55:1	0.99932	6.94175e-07
FAU	lnc-OR52A1-55:1	0.999315	7.02855e-07
CYTH3	lnc-OR52A1-55:1	0.999311	7.11198e-07
RPL9	lnc-OR52A1-55:1	0.999311	7.11552e-07
RALGPS2	lnc-OR52A1-55:1	-0.999304	7.27326e-07
PPP1R3A	lnc-OR52A1-55:1	0.999283	7.71509e-07
DSG1	lnc-OR52A1-55:1	0.999273	7.92633e-07
SSR2	lnc-OR52A1-55:1	0.999252	8.38194e-07
P4HA3	lnc-OR52A1-55:1	0.999243	8.5858e-07
HDLBP	lnc-OR52A1-55:1	0.999231	8.87525e-07
RPL23	lnc-OR52A1-55:1	0.999214	9.26477e-07
STXBP1	lnc-OR52A1-55:1	-0.999213	9.28291e-07
WASF2	lnc-OR52A1-55:1	0.999205	9.48086e-07
S100A9	lnc-OR52A1-55:1	0.999201	9.58515e-07
ERLIN2	lnc-OR52A1-55:1	0.999199	9.62159e-07
FGL2	lnc-OR52A1-55:1	0.999196	9.70483e-07
SEC16B	lnc-OR52A1-55:1	0.999186	9.93201e-07
TNFAIP6	lnc-OR52A1-55:1	0.999181	1.00493e-06
HBB	lnc-OR52A1-55:1	0.999179	1.01094e-06
RPS24	lnc-OR52A1-55:1	0.999165	1.04463e-06
PGBD5	lnc-OR52A1-55:1	-0.999157	1.06568e-06
PPARGC1A	lnc-OR52A1-55:1	0.999155	1.07166e-06
KRT4	lnc-OR52A1-55:1	0.999128	1.14031e-06
RPS6	lnc-OR52A1-55:1	0.999121	1.15841e-06
DUSP6	lnc-OR52A1-55:1	0.999117	1.16923e-06
KRT18	lnc-OR52A1-55:1	0.999111	1.18461e-06
CABP2	lnc-OR52A1-55:1	-0.999107	1.19489e-06
TOM1	lnc-OR52A1-55:1	0.999105	1.20132e-06
PLEKHF2	lnc-OR52A1-55:1	0.999102	1.2088e-06
SH3BGR	lnc-OR52A1-55:1	0.999091	1.23931e-06
PCDH18	lnc-OR52A1-55:1	0.999087	1.25057e-06
SCX	lnc-OR52A1-55:1	0.999086	1.25226e-06
VSTM4	lnc-OR52A1-55:1	0.999085	1.25632e-06
RNASE6	lnc-OR52A1-55:1	-0.999069	1.29956e-06
EEF1G	lnc-OR52A1-55:1	0.999066	1.30731e-06
APP	lnc-OR52A1-55:1	0.999061	1.3226e-06
RPS13	lnc-OR52A1-55:1	0.999052	1.34727e-06
CDH13	lnc-OR52A1-55:1	0.999035	1.39647e-06
POLR3D	lnc-OR52A1-55:1	0.999029	1.41285e-06
TNNT2	lnc-OR52A1-55:1	0.999018	1.44705e-06
EIF3E	lnc-OR52A1-55:1	0.999014	1.45892e-06
BEST3	lnc-OR52A1-55:1	0.999008	1.47664e-06
RYR3	lnc-OR52A1-55:1	0.999007	1.4794e-06
HIST1H1D	lnc-OR52A1-55:1	0.999001	1.49721e-06
CD93	lnc-OR52A1-55:1	0.999	1.5003e-06
PARP6	lnc-OR52A1-55:1	-0.998992	1.52494e-06
ADAMTS14	lnc-OR52A1-55:1	0.998983	1.55119e-06
TXNDC5	lnc-OR52A1-55:1	0.998976	1.57135e-06
IGSF3	lnc-OR52A1-55:1	0.998973	1.58237e-06
S100A6	lnc-OR52A1-55:1	0.998968	1.59762e-06
MYOCD	lnc-OR52A1-55:1	0.998951	1.64858e-06
SPINK5	lnc-OR52A1-55:1	0.998949	1.65497e-06
ANK3	lnc-OR52A1-55:1	0.998948	1.66024e-06
GPR142	lnc-OR52A1-55:1	0.998946	1.66554e-06
PIK3C2B	lnc-OR52A1-55:1	0.998946	1.66733e-06
POLD3	lnc-OR52A1-55:1	-0.998935	1.69976e-06
SERTAD3	lnc-OR52A1-55:1	0.998935	1.70191e-06
SLC16A12	lnc-OR52A1-55:1	0.998933	1.70584e-06
UGP2	lnc-OR52A1-55:1	0.998932	1.70944e-06
ROBO1	lnc-OR52A1-55:1	0.998921	1.74492e-06
TIE1	lnc-OR52A1-55:1	0.998918	1.75478e-06
ZFHX4	lnc-OR52A1-55:1	0.998912	1.77612e-06
DOCK1	lnc-OR52A1-55:1	0.998911	1.77839e-06
KRT16	lnc-OR52A1-55:1	0.998904	1.8008e-06
CFH	lnc-OR52A1-55:1	0.9989	1.81454e-06
MYLK4	lnc-OR52A1-55:1	0.998899	1.81738e-06
HBA2	lnc-OR52A1-55:1	0.99889	1.84713e-06
TMED3	lnc-OR52A1-55:1	0.99889	1.84796e-06
HIPK1	lnc-OR52A1-55:1	-0.998889	1.85003e-06
KRT17	lnc-OR52A1-55:1	0.998888	1.85262e-06
ZNF302	lnc-OR52A1-55:1	-0.998885	1.86376e-06
IMPACT	lnc-OR52A1-55:1	0.998872	1.90776e-06
ITGA8	lnc-OR52A1-55:1	0.99887	1.91312e-06
CCND2	lnc-OR52A1-55:1	0.998869	1.91762e-06
CXCL14	lnc-OR52A1-55:1	0.998865	1.93244e-06
PLOD3	lnc-OR52A1-55:1	0.998857	1.95993e-06
FGFR2	lnc-OR52A1-55:1	0.998856	1.96081e-06
DSTN	lnc-OR52A1-55:1	0.998854	1.96807e-06
EMP1	lnc-OR52A1-55:1	0.998853	1.9726e-06
WBP5	lnc-OR52A1-55:1	0.998852	1.9751e-06
WLS	lnc-OR52A1-55:1	0.99885	1.98316e-06
LRRC1	lnc-OR52A1-55:1	0.998847	1.99206e-06
GABRA1	lnc-OR52A1-55:1	-0.998847	1.99379e-06
C19orf33	lnc-OR52A1-55:1	0.998839	2.02095e-06
DSP	lnc-OR52A1-55:1	0.998835	2.03538e-06
RPS15	lnc-OR52A1-55:1	0.998831	2.04951e-06
SLC35F6	lnc-OR52A1-55:1	-0.998824	2.07255e-06
PKIB	lnc-OR52A1-55:1	-0.998822	2.07964e-06
METTL21C	lnc-OR52A1-55:1	0.998812	2.11698e-06
CTXN3	lnc-OR52A1-55:1	0.998807	2.13268e-06
SHROOM4	lnc-OR52A1-55:1	0.998803	2.14932e-06
MYOZ1	lnc-OR52A1-55:1	0.998797	2.17163e-06
MUC19	lnc-OR52A1-55:1	0.998794	2.17975e-06
NUCB1	lnc-OR52A1-55:1	0.998794	2.18038e-06
KRT13	lnc-OR52A1-55:1	0.99879	2.19514e-06
SLC20A2	lnc-OR52A1-55:1	0.998786	2.21083e-06
PLEKHG3	lnc-OR52A1-55:1	0.998783	2.21986e-06
FLG	lnc-OR52A1-55:1	0.998779	2.23466e-06
VASN	lnc-OR52A1-55:1	0.998776	2.24722e-06
RPL12	lnc-OR52A1-55:1	0.998775	2.24823e-06
BCHE	lnc-OR52A1-55:1	0.998771	2.26434e-06
IMPDH2	lnc-OR52A1-55:1	0.998767	2.27766e-06
GSTM1	lnc-OR52A1-55:1	0.998764	2.28982e-06
ASS1	lnc-OR52A1-55:1	0.998759	2.31018e-06
TMPRSS11D	lnc-OR52A1-55:1	0.998758	2.31234e-06
MMP16	lnc-OR52A1-55:1	0.998753	2.33089e-06
BMP1	lnc-OR52A1-55:1	0.998753	2.3312e-06
MYADML2	lnc-OR52A1-55:1	0.998747	2.35333e-06
RPL6	lnc-OR52A1-55:1	0.998731	2.41458e-06
GATA2	lnc-OR52A1-55:1	0.998726	2.43361e-06
NPR1	lnc-OR52A1-55:1	0.998724	2.4394e-06
MYBL2	lnc-OR52A1-55:1	-0.998714	2.47865e-06
DPP4	lnc-OR52A1-55:1	-0.998714	2.48056e-06
SRP14	lnc-OR52A1-55:1	0.998712	2.48912e-06
ITGAM	lnc-OR52A1-55:1	-0.998708	2.50291e-06
CHAD	lnc-OR52A1-55:1	0.998707	2.50832e-06
TRIM58	lnc-OR52A1-55:1	-0.9987	2.53387e-06
CDH6	lnc-OR52A1-55:1	0.998687	2.58316e-06
NFIA	lnc-OR52A1-55:1	0.998677	2.62437e-06
KRT19	lnc-OR52A1-55:1	0.998675	2.63125e-06
GJA1	lnc-OR52A1-55:1	0.998673	2.63928e-06
MRLN	lnc-OR52A1-55:1	0.99867	2.65196e-06
TNNT3	lnc-OR52A1-55:1	0.99867	2.65393e-06
COL24A1	lnc-OR52A1-55:1	0.998667	2.66313e-06
SOD3	lnc-OR52A1-55:1	0.998657	2.70251e-06
C1GALT1	lnc-OR52A1-55:1	-0.998656	2.70816e-06
ARMCX2	lnc-OR52A1-55:1	0.99865	2.7345e-06
LMOD3	lnc-OR52A1-55:1	0.998648	2.74228e-06
PCSK6	lnc-OR52A1-55:1	0.998644	2.75654e-06
KCNB1	lnc-OR52A1-55:1	-0.998644	2.75825e-06
ALDH1A3	lnc-OR52A1-55:1	0.998643	2.76188e-06
P4HB	lnc-OR52A1-55:1	0.998641	2.76799e-06
SERPINF1	lnc-OR52A1-55:1	0.998639	2.77692e-06
ZBTB16	lnc-OR52A1-55:1	0.998637	2.78395e-06
TNNT1	lnc-OR52A1-55:1	0.998635	2.79194e-06
CYP2J2	lnc-OR52A1-55:1	0.998623	2.84088e-06
LYVE1	lnc-OR52A1-55:1	0.998618	2.86502e-06
LRRN2	lnc-OR52A1-55:1	-0.99861	2.89664e-06
PBXIP1	lnc-OR52A1-55:1	0.998607	2.90964e-06
FAM169B	lnc-OR52A1-55:1	-0.998605	2.91825e-06
ZNF521	lnc-OR52A1-55:1	0.998604	2.92243e-06
DSC3	lnc-OR52A1-55:1	0.998598	2.94681e-06
CX3CR1	lnc-OR52A1-55:1	-0.998596	2.95564e-06
FAM83B	lnc-OR52A1-55:1	0.998594	2.96543e-06
NPM1	lnc-OR52A1-55:1	0.998587	2.99375e-06
ZNF469	lnc-OR52A1-55:1	0.998581	3.02078e-06
GRINA	lnc-OR52A1-55:1	-0.99858	3.02426e-06
FOXL2	lnc-OR52A1-55:1	0.998577	3.03746e-06
ANXA1	lnc-OR52A1-55:1	0.998575	3.04299e-06
NLRP11	lnc-HDAC7-21:1	0.999862	2.85934e-08
RUNDC3A	lnc-HDAC7-21:1	0.99979	6.61452e-08
HLA-C	lnc-HDAC7-21:1	0.999779	7.31386e-08
DGKH	lnc-HDAC7-21:1	0.999732	1.0752e-07
LYN	lnc-HDAC7-21:1	0.999716	1.20752e-07
IGLON5	lnc-HDAC7-21:1	0.999703	1.32111e-07
KCNJ16	lnc-HDAC7-21:1	0.999629	2.06986e-07
TREM1	lnc-HDAC7-21:1	0.99959	2.52355e-07
EPT1	lnc-HDAC7-21:1	0.999561	2.89207e-07
ESPN	lnc-HDAC7-21:1	0.999551	3.02189e-07
RLF	lnc-HDAC7-21:1	-0.999512	3.56506e-07
TMEM176B	lnc-HDAC7-21:1	0.999507	3.65116e-07
LRRC16B	lnc-HDAC7-21:1	0.999471	4.19057e-07
GRM8	lnc-HDAC7-21:1	0.999465	4.28642e-07
ARG2	lnc-HDAC7-21:1	0.999452	4.49701e-07
GRIK2	lnc-HDAC7-21:1	0.999407	5.278e-07
CHI3L2	lnc-HDAC7-21:1	0.999382	5.72309e-07
ST8SIA3	lnc-HDAC7-21:1	0.999371	5.94004e-07
PUM2	lnc-HDAC7-21:1	0.999289	7.57107e-07
MFAP3L	lnc-HDAC7-21:1	0.999276	7.86357e-07
MMP12	lnc-HDAC7-21:1	0.99927	7.98882e-07
CKMT1A	lnc-HDAC7-21:1	0.999239	8.68162e-07
DNER	lnc-HDAC7-21:1	0.999201	9.56508e-07
SHISA9	lnc-HDAC7-21:1	0.999186	9.94242e-07
CNGB1	lnc-HDAC7-21:1	0.999157	1.06613e-06
CECR1	lnc-HDAC7-21:1	0.999134	1.12586e-06
FIGNL1	lnc-HDAC7-21:1	0.999103	1.20749e-06
FCGR1A	lnc-HDAC7-21:1	0.999096	1.22411e-06
PCYT1B	lnc-HDAC7-21:1	0.999085	1.25455e-06
PPM1H	lnc-HDAC7-21:1	0.999056	1.33507e-06
GRM1	lnc-HDAC7-21:1	0.999041	1.37858e-06
LIMK2	lnc-HDAC7-21:1	0.99904	1.38214e-06
UBR4	lnc-HDAC7-21:1	0.999018	1.44556e-06
GPR137B	lnc-HDAC7-21:1	0.998977	1.56891e-06
NFASC	lnc-HDAC7-21:1	0.998951	1.6485e-06
SHROOM2	lnc-HDAC7-21:1	0.998947	1.66168e-06
GTSE1	lnc-HDAC7-21:1	0.998942	1.67995e-06
CALML4	lnc-HDAC7-21:1	0.998913	1.77308e-06
TNR	lnc-HDAC7-21:1	0.998862	1.94168e-06
SMG7	lnc-HDAC7-21:1	0.998853	1.97223e-06
RCOR3	lnc-HDAC7-21:1	0.998851	1.98058e-06
UNC5D	lnc-HDAC7-21:1	0.998845	1.99903e-06
UBE2L6	lnc-HDAC7-21:1	0.998844	2.0051e-06
TTC9	lnc-HDAC7-21:1	0.998833	2.043e-06
CELF6	lnc-HDAC7-21:1	0.998806	2.13744e-06
CNGA1	lnc-HDAC7-21:1	0.998786	2.21018e-06
2018-09-03	lnc-HDAC7-21:1	0.998784	2.21653e-06
KIF5A	lnc-HDAC7-21:1	0.998778	2.23937e-06
TPRX1	lnc-HDAC7-21:1	0.998758	2.31455e-06
TTLL9	lnc-HDAC7-21:1	0.998715	2.4776e-06
ATL3	lnc-HDAC7-21:1	-0.998712	2.48552e-06
CRYM	lnc-HDAC7-21:1	0.998701	2.52981e-06
CNTNAP5	lnc-HDAC7-21:1	0.998681	2.60735e-06
ZFAND3	lnc-HDAC7-21:1	0.998677	2.62395e-06
CTSH	lnc-HDAC7-21:1	0.998673	2.64215e-06
GNG3	lnc-HDAC7-21:1	0.998662	2.68499e-06
PLEKHA6	lnc-HDAC7-21:1	0.998609	2.90156e-06
CACYBP	lnc-HDAC7-21:1	0.998608	2.90445e-06
SAMD7	lnc-HDAC7-21:1	0.998599	2.94474e-06
STRA6	lnc-HDAC7-21:1	0.99859	2.97899e-06
POGZ	lnc-HDAC7-21:1	0.998581	3.01948e-06
HYAL4	lnc-HDAC7-21:1	0.998578	3.03316e-06
ORC1	lnc-HDAC7-21:1	0.998573	3.05233e-06
NUP93	lnc-HDAC7-21:1	0.998568	3.07337e-06
ZNF718	lnc-HDAC7-21:1	0.998527	3.2514e-06
YWHAH	lnc-HDAC7-21:1	0.998521	3.27878e-06
CSE1L	lnc-HDAC7-21:1	0.998498	3.38036e-06
PTPRO	lnc-HDAC7-21:1	0.998484	3.44471e-06
LSAMP	lnc-HDAC7-21:1	0.998478	3.47265e-06
KLHDC8A	lnc-HDAC7-21:1	0.998474	3.49115e-06
AHCTF1	lnc-HDAC7-21:1	0.998458	3.56531e-06
CCDC60	lnc-HDAC7-21:1	0.998388	3.89484e-06
C1QC	lnc-HDAC7-21:1	0.998337	4.14477e-06
C19orf60	lnc-HDAC7-21:1	-0.998302	4.32472e-06
TMEM33	lnc-HDAC7-21:1	0.99829	4.38408e-06
PTGDS	lnc-HDAC7-21:1	0.99825	4.59284e-06
ADGRG1	lnc-HDAC7-21:1	0.998249	4.59671e-06
OLAH	lnc-HDAC7-21:1	0.998241	4.63861e-06
STIL	lnc-HDAC7-21:1	0.998239	4.65032e-06
ELOVL1	lnc-HDAC7-21:1	-0.998216	4.7698e-06
TP73	lnc-HDAC7-21:1	0.998214	4.77973e-06
NCMAP	lnc-HDAC7-21:1	0.99821	4.80452e-06
COQ10A	lnc-HDAC7-21:1	0.998191	4.9045e-06
LGALS3BP	lnc-HDAC7-21:1	0.998179	4.96999e-06
TGFBR1	lnc-HDAC7-21:1	0.998171	5.0123e-06
KLHL23	lnc-HDAC7-21:1	0.998123	5.28187e-06
HTT	lnc-HDAC7-21:1	0.998119	5.30438e-06
SCN1A	lnc-HDAC7-21:1	0.998117	5.31797e-06
RAD54L2	lnc-HDAC7-21:1	0.998115	5.32442e-06
CLSPN	lnc-HDAC7-21:1	0.998089	5.47542e-06
KCTD3	lnc-HDAC7-21:1	0.99808	5.52819e-06
ARMC9	lnc-HDAC7-21:1	0.998075	5.55579e-06
ARL6	lnc-HDAC7-21:1	0.998071	5.578e-06
KDM6B	lnc-HDAC7-21:1	-0.998059	5.64566e-06
HCLS1	lnc-HDAC7-21:1	0.998056	5.66751e-06
ABAT	lnc-HDAC7-21:1	0.998046	5.72529e-06
FGF12	lnc-HDAC7-21:1	0.998013	5.91863e-06
SLC7A14	lnc-HDAC7-21:1	0.998007	5.95431e-06
ELF4	lnc-HDAC7-21:1	-0.998001	5.98795e-06
TUBGCP4	lnc-HDAC7-21:1	0.997988	6.06819e-06
RPA3	lnc-HDAC7-21:1	0.997971	6.17248e-06
CNR1	lnc-HDAC7-21:1	0.997944	6.33509e-06
RLBP1	lnc-HDAC7-21:1	0.997944	6.33735e-06
C15orf59	lnc-HDAC7-21:1	0.99794	6.3611e-06
OPA1	lnc-HDAC7-21:1	0.997939	6.36761e-06
PPM1E	lnc-HDAC7-21:1	0.997916	6.50758e-06
PCDHGC4	lnc-HDAC7-21:1	0.997914	6.5211e-06
UHRF1BP1	lnc-HDAC7-21:1	0.99791	6.54752e-06
CRMP1	lnc-HDAC7-21:1	0.997898	6.62343e-06
TET2	lnc-HDAC7-21:1	-0.997887	6.69282e-06
NDUFA4L2	lnc-HDAC7-21:1	0.997887	6.69357e-06
CACNG5	lnc-HDAC7-21:1	0.997873	6.78308e-06
CRTAC1	lnc-HDAC7-21:1	0.99786	6.86369e-06
RMI2	lnc-HDAC7-21:1	0.99786	6.86653e-06
SH3BP2	lnc-HDAC7-21:1	0.997822	7.11122e-06
GBP3	lnc-HDAC7-21:1	0.997812	7.17786e-06
TRIM33	lnc-HDAC7-21:1	0.997809	7.19263e-06
SGK494	lnc-HDAC7-21:1	0.99779	7.32013e-06
MXD1	lnc-HDAC7-21:1	0.997784	7.3617e-06
ZNF418	lnc-HDAC7-21:1	0.997776	7.41387e-06
SYN1	lnc-HDAC7-21:1	0.99777	7.45348e-06
ZNF883	lnc-HDAC7-21:1	0.997756	7.54862e-06
KCNG4	lnc-HDAC7-21:1	0.997751	7.5813e-06
PODXL2	lnc-HDAC7-21:1	0.997748	7.602e-06
ZNF789	lnc-HDAC7-21:1	0.997744	7.62891e-06
ERICH3	lnc-HDAC7-21:1	0.997743	7.63567e-06
BSN	lnc-HDAC7-21:1	0.997741	7.65052e-06
C12orf5	lnc-HDAC7-21:1	0.99774	7.65862e-06
TRAK2	lnc-HDAC7-21:1	0.997731	7.71409e-06
CTPS1	lnc-HDAC7-21:1	0.997718	7.80673e-06
ZNF736	lnc-HDAC7-21:1	0.997706	7.88422e-06
GALNT8	lnc-HDAC7-21:1	0.997696	7.95347e-06
TSPAN33	lnc-HDAC7-21:1	-0.997693	7.98036e-06
PELI2	lnc-HDAC7-21:1	0.997691	7.99006e-06
PHF19	lnc-HDAC7-21:1	0.997679	8.07608e-06
GRIA1	lnc-HDAC7-21:1	0.997667	8.1605e-06
SPTBN5	lnc-HDAC7-21:1	0.997664	8.17652e-06
STON2	lnc-HDAC7-21:1	0.99766	8.21045e-06
FABP7	lnc-HDAC7-21:1	0.997629	8.42678e-06
SPATA13	lnc-HDAC7-21:1	0.997615	8.52483e-06
MAPK8IP2	lnc-HDAC7-21:1	0.997613	8.53977e-06
DFNA5	lnc-HDAC7-21:1	0.997611	8.5534e-06
ZNF124	lnc-HDAC7-21:1	0.997609	8.57115e-06
CTNNA2	lnc-HDAC7-21:1	0.997606	8.58714e-06
TPMT	lnc-HDAC7-21:1	0.997598	8.64691e-06
VPS26B	lnc-HDAC7-21:1	0.997597	8.65796e-06
MLLT3	lnc-HDAC7-21:1	-0.997584	8.7505e-06
EYA2	lnc-HDAC7-21:1	0.997581	8.76897e-06
TPO	lnc-HDAC7-21:1	0.997561	8.91685e-06
HMGB3	lnc-HDAC7-21:1	0.99756	8.92107e-06
LIX1	lnc-HDAC7-21:1	0.997559	8.93294e-06
CEP164	lnc-HDAC7-21:1	0.997554	8.96351e-06
ARHGAP33	lnc-HDAC7-21:1	0.997545	9.03172e-06
CECR6	lnc-HDAC7-21:1	0.997531	9.13584e-06
ZFY	lnc-HDAC7-21:1	0.997524	9.18693e-06
ZCCHC2	lnc-HDAC7-21:1	0.997516	9.2465e-06
ZMYND10	lnc-DAZ1-161:1	0.999951	3.66497e-09
SV2C	lnc-DAZ1-161:1	0.99995	3.76935e-09
RAB11FIP1	lnc-DAZ1-161:1	-0.999906	1.31235e-08
REC8	lnc-DAZ1-161:1	0.999847	3.48929e-08
EIF1AY	lnc-DAZ1-161:1	0.999847	3.52124e-08
SGIP1	lnc-DAZ1-161:1	0.999831	4.29143e-08
CRAT	lnc-DAZ1-161:1	-0.999742	1.00106e-07
CCDC64	lnc-DAZ1-161:1	0.999681	1.52725e-07
TMEM159	lnc-DAZ1-161:1	-0.999632	2.02941e-07
PACSIN1	lnc-DAZ1-161:1	0.999621	2.1509e-07
MSI1	lnc-DAZ1-161:1	0.999601	2.38256e-07
MAP10	lnc-DAZ1-161:1	0.999533	3.27228e-07
LIN28B	lnc-DAZ1-161:1	0.99953	3.31517e-07
HIPK3	lnc-DAZ1-161:1	-0.99951	3.60613e-07
RAVER2	lnc-DAZ1-161:1	-0.999488	3.93396e-07
SLAMF8	lnc-DAZ1-161:1	0.999479	4.06655e-07
LOC644249	lnc-DAZ1-161:1	0.99942	5.03827e-07
IFI6	lnc-DAZ1-161:1	0.999407	5.27686e-07
DNMT3L	lnc-DAZ1-161:1	0.999401	5.37305e-07
TRIM71	lnc-DAZ1-161:1	0.999289	7.59098e-07
CAST	lnc-DAZ1-161:1	-0.999282	7.73182e-07
HEPACAM	lnc-DAZ1-161:1	0.999276	7.86937e-07
SRSF2	lnc-DAZ1-161:1	0.999222	9.08288e-07
CST3	lnc-DAZ1-161:1	0.999217	9.18696e-07
IGSF21	lnc-DAZ1-161:1	0.999206	9.46314e-07
CNRIP1	lnc-DAZ1-161:1	0.999202	9.54214e-07
IGSF9	lnc-DAZ1-161:1	0.999193	9.76802e-07
SDHD	lnc-DAZ1-161:1	-0.999189	9.86615e-07
CNOT6	lnc-DAZ1-161:1	0.999179	1.01032e-06
RPS28	lnc-DAZ1-161:1	-0.999105	1.2004e-06
EPSTI1	lnc-DAZ1-161:1	0.999105	1.20139e-06
RPSA	lnc-DAZ1-161:1	-0.99909	1.2417e-06
NGFR	lnc-DAZ1-161:1	0.999083	1.26054e-06
TAF5	lnc-DAZ1-161:1	0.999082	1.26235e-06
LRIT1	lnc-DAZ1-161:1	0.999076	1.27979e-06
ATL2	lnc-DAZ1-161:1	-0.999063	1.31632e-06
TGIF2	lnc-DAZ1-161:1	-0.999023	1.43219e-06
ADD3	lnc-DAZ1-161:1	-0.99898	1.55874e-06
ZBED4	lnc-DAZ1-161:1	0.99889	1.84887e-06
ZNF367	lnc-DAZ1-161:1	0.998876	1.89455e-06
PSIP1	lnc-DAZ1-161:1	0.998849	1.98636e-06
PRDM8	lnc-DAZ1-161:1	0.998817	2.09696e-06
IQGAP1	lnc-DAZ1-161:1	-0.998813	2.112e-06
RPL18	lnc-DAZ1-161:1	-0.998813	2.11235e-06
FAM19A4	lnc-DAZ1-161:1	0.998796	2.17473e-06
CBLN1	lnc-DAZ1-161:1	0.998769	2.27325e-06
COX4I1	lnc-DAZ1-161:1	-0.998768	2.27406e-06
LLGL2	lnc-DAZ1-161:1	0.998761	2.30159e-06
PCBP4	lnc-DAZ1-161:1	0.998752	2.33665e-06
PCDHA12	lnc-DAZ1-161:1	0.998742	2.37207e-06
HNRNPD	lnc-DAZ1-161:1	0.998738	2.38795e-06
SMIM13	lnc-DAZ1-161:1	0.998724	2.44032e-06
HAP1	lnc-DAZ1-161:1	0.99872	2.45514e-06
CACNA2D4	lnc-DAZ1-161:1	0.9987	2.53387e-06
EDF1	lnc-DAZ1-161:1	-0.998673	2.64144e-06
PITPNM1	lnc-DAZ1-161:1	0.998666	2.66857e-06
ABCC10	lnc-DAZ1-161:1	0.998654	2.71484e-06
PHF2	lnc-DAZ1-161:1	-0.99865	2.73358e-06
ABCA5	lnc-DAZ1-161:1	0.998647	2.74653e-06
PLCH1	lnc-DAZ1-161:1	0.998639	2.77589e-06
KIAA1524	lnc-DAZ1-161:1	0.998614	2.88137e-06
CLGN	lnc-DAZ1-161:1	0.998608	2.90511e-06
LEP	lnc-DAZ1-161:1	0.998589	2.98708e-06
MAATS1	lnc-DAZ1-161:1	0.998578	3.03182e-06
ZDHHC11B	lnc-DAZ1-161:1	0.998566	3.0815e-06
NXNL1	lnc-DAZ1-161:1	0.998541	3.18938e-06
CDC45	lnc-DAZ1-161:1	0.99854	3.19458e-06
FPR3	lnc-DAZ1-161:1	0.998528	3.24923e-06
LHFPL4	lnc-DAZ1-161:1	0.998507	3.33987e-06
PRDX2	lnc-DAZ1-161:1	0.998506	3.34598e-06
ATAD5	lnc-DAZ1-161:1	0.998497	3.3873e-06
GTF2A1	lnc-DAZ1-161:1	0.998492	3.41079e-06
CNST	lnc-DAZ1-161:1	0.998488	3.4262e-06
KIFC2	lnc-DAZ1-161:1	0.998484	3.44764e-06
INPP5K	lnc-DAZ1-161:1	-0.998482	3.45504e-06
HIST1H2BJ	lnc-DAZ1-161:1	0.998475	3.4885e-06
CHD5	lnc-DAZ1-161:1	0.998469	3.51407e-06
UTRN	lnc-DAZ1-161:1	-0.998463	3.5395e-06
FBXO45	lnc-DAZ1-161:1	0.998461	3.55055e-06
LMO3	lnc-DAZ1-161:1	0.998458	3.56468e-06
DTX1	lnc-DAZ1-161:1	0.998451	3.59765e-06
MORF4L1	lnc-DAZ1-161:1	-0.998447	3.61612e-06
PRDX6	lnc-DAZ1-161:1	-0.998445	3.62461e-06
SH3BGRL	lnc-DAZ1-161:1	-0.998424	3.72429e-06
SERBP1	lnc-DAZ1-161:1	-0.998424	3.72469e-06
EIF4H	lnc-DAZ1-161:1	-0.998413	3.77435e-06
ZNF555	lnc-DAZ1-161:1	-0.998405	3.81167e-06
SSTR2	lnc-DAZ1-161:1	0.998402	3.82709e-06
KLC4	lnc-DAZ1-161:1	0.99839	3.88812e-06
CRACR2A	lnc-DAZ1-161:1	0.998369	3.98952e-06
SUSD1	lnc-DAZ1-161:1	0.998362	4.02309e-06
IGDCC3	lnc-DAZ1-161:1	0.998357	4.04503e-06
SPI1	lnc-DAZ1-161:1	0.998344	4.11017e-06
IFI44	lnc-DAZ1-161:1	0.998325	4.20728e-06
CDK5R2	lnc-DAZ1-161:1	0.998321	4.22747e-06
DR1	lnc-DAZ1-161:1	-0.998303	4.31814e-06
COPB1	lnc-DAZ1-161:1	-0.998302	4.32133e-06
RNASEH2C	lnc-DAZ1-161:1	0.998282	4.42539e-06
DDC	lnc-DAZ1-161:1	0.998281	4.42919e-06
DLG4	lnc-DAZ1-161:1	0.998277	4.44929e-06
CKAP2	lnc-DAZ1-161:1	0.998244	4.62191e-06
RSPH1	lnc-DAZ1-161:1	0.998237	4.6612e-06
C2orf48	lnc-DAZ1-161:1	0.998224	4.72898e-06
HLA-DQA1	lnc-DAZ1-161:1	0.998148	5.14057e-06
CPNE1	lnc-DAZ1-161:1	-0.998145	5.15695e-06
MIEF2	lnc-DAZ1-161:1	-0.998136	5.20763e-06
SFI1	lnc-DAZ1-161:1	0.998133	5.22294e-06
TMEM132B	lnc-DAZ1-161:1	0.99813	5.23942e-06
SOD2	lnc-DAZ1-161:1	0.998116	5.32352e-06
SCML2	lnc-DAZ1-161:1	0.998115	5.32379e-06
FBXL16	lnc-DAZ1-161:1	0.998101	5.40525e-06
BRPF3	lnc-DAZ1-161:1	0.998088	5.48069e-06
TRRAP	lnc-DAZ1-161:1	0.99805	5.70212e-06
GDI2	lnc-DAZ1-161:1	-0.998041	5.75463e-06
HNF4A	lnc-DAZ1-161:1	0.99804	5.75706e-06
FAM110B	lnc-DAZ1-161:1	-0.998032	5.80323e-06
TCEAL2	lnc-DAZ1-161:1	0.998023	5.85739e-06
CNN3	lnc-DAZ1-161:1	-0.998015	5.90657e-06
TXNIP	lnc-DAZ1-161:1	-0.998009	5.94484e-06
ERGIC1	lnc-DAZ1-161:1	-0.997996	6.02073e-06
INSM1	lnc-DAZ1-161:1	0.997971	6.17015e-06
RTN4RL1	lnc-DAZ1-161:1	0.997968	6.18821e-06
RPL35A	lnc-DAZ1-161:1	-0.997965	6.20479e-06
TRPM2	lnc-DAZ1-161:1	0.997952	6.28578e-06
IGFBPL1	lnc-DAZ1-161:1	0.997951	6.29098e-06
INPP5A	lnc-DAZ1-161:1	-0.997946	6.32328e-06
CCDC85C	lnc-DAZ1-161:1	0.997942	6.34891e-06
EREG	lnc-DAZ1-161:1	-0.997933	6.40455e-06
ID4	lnc-DAZ1-161:1	0.997931	6.4173e-06
NETO1	lnc-DAZ1-161:1	0.997926	6.45004e-06
RAB5B	lnc-DAZ1-161:1	-0.997922	6.47278e-06
KSR2	lnc-DAZ1-161:1	0.997913	6.53065e-06
KDM5B	lnc-DAZ1-161:1	-0.997906	6.57103e-06
PHGDH	lnc-DAZ1-161:1	-0.997904	6.58359e-06
QARS	lnc-DAZ1-161:1	-0.997898	6.62002e-06
PGBD1	lnc-DAZ1-161:1	0.997896	6.63398e-06
KIF18A	lnc-DAZ1-161:1	0.997889	6.67945e-06
CENPE	lnc-DAZ1-161:1	0.997876	6.76028e-06
GFRA1	lnc-DAZ1-161:1	-0.997875	6.76924e-06
TEX15	lnc-DAZ1-161:1	0.997861	6.85929e-06
RABAC1	lnc-DAZ1-161:1	-0.997857	6.88306e-06
RTBDN	lnc-DAZ1-161:1	0.997832	7.04335e-06
ABCA7	lnc-DAZ1-161:1	0.997814	7.16425e-06
PBK	lnc-DAZ1-161:1	0.997797	7.27371e-06
PCSK1N	lnc-DAZ1-161:1	0.997755	7.55671e-06
RABGAP1L	lnc-DAZ1-161:1	0.997754	7.56364e-06
TYMS	lnc-DAZ1-161:1	0.997749	7.59749e-06
TLE6	lnc-DAZ1-161:1	0.997733	7.70297e-06
FSD1L	lnc-DAZ1-161:1	0.997727	7.74449e-06
CREB5	lnc-DAZ1-161:1	-0.997723	7.77046e-06
RPL36A	lnc-DAZ1-161:1	-0.997717	7.8111e-06
GATS	lnc-DAZ1-161:1	0.997693	7.97878e-06
HDAC4	lnc-DAZ1-161:1	-0.99769	7.99563e-06
DDX3X	lnc-DAZ1-161:1	-0.997684	8.04179e-06
ZNF568	lnc-DAZ1-161:1	-0.997681	8.05706e-06
EFCAB1	lnc-DAZ1-161:1	0.997667	8.15806e-06
MSANTD4	lnc-DAZ1-161:1	0.997666	8.16162e-06
SCN2A	lnc-DAZ1-161:1	0.997665	8.17137e-06
ROCK1	lnc-DAZ1-161:1	-0.997659	8.21248e-06
RTN1	lnc-DAZ1-161:1	0.997653	8.25787e-06
SLAIN2	lnc-DAZ1-161:1	-0.997645	8.31497e-06
GABBR2	lnc-DAZ1-161:1	0.997633	8.39531e-06
FAM81A	lnc-DAZ1-161:1	0.997631	8.4114e-06
CXADR	lnc-DAZ1-161:1	0.997625	8.4524e-06
CORO2A	lnc-DAZ1-161:1	0.997621	8.47976e-06
DOC2A	lnc-DAZ1-161:1	0.99762	8.48667e-06
CPLX2	lnc-DAZ1-161:1	0.997613	8.54024e-06
SIDT2	lnc-DAZ1-161:1	-0.997609	8.56961e-06
CNNM3	lnc-DAZ1-161:1	0.997594	8.67512e-06
UHRF1	lnc-DAZ1-161:1	0.997592	8.68871e-06
VSX1	lnc-DAZ1-161:1	0.997592	8.69388e-06
RPL23A	lnc-DAZ1-161:1	-0.997578	8.79535e-06
ACSM5	lnc-DAZ1-161:1	0.997577	8.80238e-06
GPATCH11	lnc-DAZ1-161:1	0.997576	8.806e-06
SUMF1	lnc-DAZ1-161:1	-0.997557	8.94833e-06
ASPA	lnc-DAZ1-161:1	-0.997549	9.00276e-06
CAPZA1	lnc-DAZ1-161:1	-0.997546	9.02787e-06
MAP6	lnc-DAZ1-161:1	0.997535	9.10935e-06
NFATC2IP	lnc-DAZ1-161:1	0.997523	9.19228e-06
SETBP1	lnc-DAZ1-161:1	-0.997522	9.19941e-06
CFAP47	lnc-DAZ1-161:1	0.99752	9.21763e-06
